# Supplementary material for: 2’’-O-galloylhyperin as a novel adjuvant to reduce imipenem resistance in multidrug-resistant Pseudomonas aeruginosa: Transcriptome-based mechanism of iron homeostasis disruption
Source: Research Square preprint supplement (doi:10.21203/rs.3.rs-8494972/v1), 2026-01-14
Supplement: Supplementary file 1 [file 87cb6845edd49279d7fb7f99.xlsx]

## Sheet: Table S1
Table S1 Medicine Food Homology Compound Library
Add the names of compounds (1 mM)	Primary Classification	Secondary Classification	Imipenem concentration (µg/mL)
			0	1	2	16	32	64	128	256	512	1024
none	none	none	0	0.886	0.824	0.807	0.8	0.557	0.43	0.381	0.278	0.113
Triolein	Others		-0.063	0.883	0.785	0.781	0.719	0.461	0.431	0.365	0.282	0.114
Stearic acid	Ketones/aldehydes/acids		-0.061	0.738	0.725	0.788	0.733	0.479	0.428	0.417	0.278	0.206
Liensinine	Alkaloid	Alkaloid dimers	-0.101	0.639	0.73	0.694	0.479	0.396	0.376	0.325	0.213	0.104
Myristicin	Phenylpropanoids	simple phenylpropanoids	-0.052	0.822	0.742	0.742	0.683	0.478	0.395	0.346	0.268	0.108
Cholesterol	Steroids		-0.064	0.872	0.855	0.744	0.741	0.456	0.391	0.34	0.246	0.097
Genistein	Flavonoid	Isoflavone	-0.062	0.755	0.789	0.779	0.738	0.457	0.4	0.349	0.257	0.109
Tussilagone	Terpenoid	Sesquiterpene	-0.019	0.779	0.752	0.753	0.67	0.423	0.388	0.323	0.246	0.11
4',5-Dihydroxyflavone	Flavonoid	Flavone	-0.022	0.793	0.8	0.735	0.716	0.421	0.372	0.321	0.238	0.169
Byakangelicol	Phenylpropanoids	Coumarin	-0.063	0.769	0.724	0.704	0.719	0.416	0.374	0.326	0.24	0.105
Ginsenoside F1	Terpenoid	Triterpene	-0.043	0.768	0.741	0.734	0.699	0.497	0.378	0.325	0.238	0.098
Piperlongumine	Glycosides	Pyridine alkaloid	-0.062	0.787	0.738	0.742	0.678	0.428	0.363	0.331	0.238	0.102
Decursin	Phenylpropanoids	Coumarin	-0.017	0.828	0.832	0.82	0.786	0.443	0.386	0.351	0.246	0.107
Sucralose	Carbohydrate		-0.046	0.818	0.818	0.804	0.744	0.516	0.372	0.327	0.196	0.1
Thiocolchicoside	Alkaloid	Other alkaloids	-0.074	0.805	0.784	0.776	0.773	0.578	0.379	0.326	0.256	0.128
(+)-Kavain	Phenylpropanoids	Other phenylpropanoids	-0.147	0.695	0.681	0.702	0.667	0.41	0.301	0.275	0.227	0.114
Rebaudioside A	Terpenoid	Diterpene	-0.145	0.677	0.713	0.683	0.619	0.414	0.308	0.271	0.224	0.122
Macelignan	Phenylpropanoids	Lignan	-0.173	0.702	0.67	0.668	0.605	0.311	0.332	0.298	0.235	0.117
Glycitein	Flavonoid	Isoflavone	-0.162	0.682	0.689	0.653	0.676	0.398	0.305	0.273	0.234	0.128
L-Arginine (hydrochloride)	Others		-0.133	0.688	0.7	0.653	0.618	0.497	0.322	0.33	0.245	0.124
Schaftoside	Flavonoid	Flavone	-0.105	0.669	0.678	0.618	0.645	0.477	0.351	0.329	0.271	0.147
Perillartine	Others		-0.157	0.68	0.68	0.651	0.648	0.416	0.332	0.302	0.259	0.142
Hyperoside	Flavonoid	Flavonol	-0.088	0.692	0.738	0.659	0.638	0.371	0.345	0.316	0.271	0.18
Isoastragaloside II	Terpenoid	Triterpene	-0.189	0.652	0.639	0.621	0.567	0.33	0.318	0.307	0.262	0.141
Astragaloside II	Terpenoid	Triterpene	-0.183	0.687	0.649	0.628	0.603	0.417	0.333	0.314	0.271	0.146
Citric acid (trilithium salt tetrahydrate)	Ketones/aldehydes/acids		-0.131	0.674	0.669	0.673	0.629	0.357	0.355	0.33	0.298	0.223
Citronellol	Others		-0.156	0.653	0.618	0.635	0.582	0.365	0.323	0.299	0.248	0.132
Sesamol	Phenols		-0.157	0.617	0.63	0.615	0.566	0.308	0.319	0.287	0.246	0.131
Hordenine	Alkaloid	Other alkaloids	-0.148	0.627	0.653	0.6	0.591	0.332	0.294	0.28	0.24	0.124
Moracin M	Phenols		-0.159	0.6	0.622	0.606	0.456	0.349	0.32	0.292	0.249	0.142
8-Gingerol	Phenols		-0.208	0.678	0.65	0.642	0.611	0.339	0.329	0.305	0.248	0.13
Silibinin	Flavonoid	Dihydroflavonol	-0.069	0.832	0.84	0.825	0.778	0.518	0.366	0.316	0.219	0.092
Caffeic acid	Phenylpropanoids	simple phenylpropanoids	-0.051	0.709	0.707	0.708	0.685	0.495	0.441	0.415	0.276	0.127
Chlorogenic acid	Phenylpropanoids	simple phenylpropanoids	-0.066	0.722	0.727	0.757	0.598	0.425	0.438	0.344	0.259	0.155
Licoflavone A	Flavonoid	Flavone	-0.015	0.84	0.821	0.837	0.778	0.448	0.382	0.335	0.23	0.098
Cinnamyl Alcohol	Phenylpropanoids	simple phenylpropanoids	-0.061	0.8	0.803	0.714	0.739	0.382	0.337	0.33	0.226	0.109
Dehydroandrographolide	Terpenoid	Diterpene	-0.064	0.736	0.783	0.671	0.728	0.624	0.371	0.352	0.253	0.192
Scutellarin	Flavonoid	Flavone	-0.07	0.816	0.771	0.738	0.712	0.388	0.301	0.325	0.131	0.08
Bardoxolone	Others		-0.093	0.758	0.746	0.742	0.706	0.406	0.392	0.318	0.235	0.106
Isoferulic acid	Phenylpropanoids	simple phenylpropanoids	-0.056	0.753	0.754	0.75	0.728	0.441	0.377	0.324	0.221	0.103
Ethyl ferulate	Phenylpropanoids	simple phenylpropanoids	-0.052	0.819	0.782	0.788	0.739	0.451	0.363	0.331	0.246	0.131
Oleanolic Acid	Terpenoid	Triterpene	-0.1	0.669	0.712	0.749	0.686	0.454	0.389	0.342	0.255	0.125
3-Dehydrotrametenolic acid	Terpenoid	Triterpene	-0.081	0.807	0.794	0.772	0.784	0.667	0.318	0.278	0.199	0.126
Danthron	Quinones	Anthraquinones	-0.042	0.738	0.807	0.784	0.815	0.547	0.342	0.303	0.216	0.108
L-SelenoMethionine	Ketones/aldehydes/acids		-0.057	0.741	0.768	0.819	0.712	0.377	0.345	0.297	0.228	0.097
Platycodin D	Terpenoid	Triterpene	-0.066	0.724	0.771	0.775	0.765	0.444	0.345	0.302	0.214	0.084
Cycloastragenol	Terpenoid	Triterpene	-0.059	0.83	0.88	0.842	0.78	0.377	0.322	0.289	0.185	0.09
Gardenoside	Terpenoid	Iridoids	-0.04	0.882	0.805	0.817	0.707	0.372	0.35	0.311	0.234	0.111
Juglone	Quinones	Naphthoquinones	-0.042	0.857	0.849	0.897	0.876	0.73	0.338	0.292	0.222	0.176
Syringaldehyde	Ketones/aldehydes/acids		-0.066	0.68	0.729	0.735	0.758	0.627	0.309	0.3	0.246	0.126
Petroselinic acid	Ketones/aldehydes/acids		-0.04	0.884	0.777	0.786	0.761	0.597	0.342	0.296	0.235	0.099
Ganoderic acid A	Terpenoid	Triterpene	-0.078	0.775	0.786	0.771	0.776	0.64	0.346	0.306	0.228	0.088
Ginsenoside Rh1	Terpenoid	Triterpene	-0.07	0.84	0.776	0.813	0.797	0.612	0.367	0.323	0.236	0.099
Synephrine (hydrochloride)	Alkaloid	Other alkaloids	-0.075	0.929	0.829	0.837	0.743	0.36	0.331	0.303	0.244	0.097
Nerol	Others		-0.06	1.042	0.784	0.792	0.795	0.463	0.346	0.306	0.235	0.105
(-)-Limonene	Terpenoid	Other monoterpenes	-0.063	0.961	0.8	0.794	0.754	0.429	0.322	0.291	0.224	0.174
Sophoricoside	Flavonoid	Isoflavone	-0.065	0.975	0.815	0.805	0.736	0.396	0.33	0.296	0.225	0.098
Ethyl 3-coumarincarboxylate	Phenylpropanoids	Coumarin	-0.04	0.923	0.796	0.794	0.766	0.408	0.327	0.298	0.221	0.093
Daphnetin	Phenylpropanoids	Coumarin	-0.164	0.837	0.737	0.732	0.622	0.439	0.413	0.402	0.37	0.298
Ginkgolide C	Terpenoid	Diterpene	-0.008	0.796	0.804	0.802	0.702	0.433	0.392	0.363	0.239	0.114
Hydroxy-β-sanshool	Alkaloid	Other alkaloids	-0.039	0.746	0.745	0.711	0.695	0.424	0.394	0.358	0.263	0.105
Shikimic acid	Ketones/aldehydes/acids		-0.039	0.891	0.652	0.713	0.698	0.405	0.379	0.345	0.27	0.177
Nerolidol	Terpenoid	Sesquiterpene	-0.086	0.89	0.732	0.673	0.697	0.403	0.384	0.354	0.286	0.103
Eriodictyol	Flavonoid	Dihydroflavone	-0.008	0.631	0.605	0.577	0.539	0.449	0.43	0.416	0.377	0.255
Germacrone	Terpenoid	Sesquiterpene	-0.006	0.824	0.836	0.744	0.77	0.415	0.399	0.352	0.28	0.097
Dehydronuciferine	Alkaloid	Quinoline alkaloids	0.019	0.797	0.825	0.822	0.779	0.445	0.382	0.342	0.254	0.108
Pulegone	Terpenoid	Other monoterpenes	-0.018	0.759	0.743	0.745	0.68	0.412	0.385	0.34	0.267	0.109
(-)-Fenchone	Terpenoid	Other monoterpenes	-0.04	0.66	0.689	0.736	0.715	0.412	0.373	0.284	0.258	0.189
Tiglic acid	Ketones/aldehydes/acids		-0.042	0.804	0.707	0.734	0.652	0.405	0.375	0.33	0.257	0.102
Isorhamnetin	Flavonoid	Flavonol	-0.024	0.765	0.787	0.766	0.759	0.53	0.376	0.33	0.256	0.114
Daidzein	Flavonoid	Isoflavone	-0.026	0.764	0.754	0.745	0.681	0.405	0.381	0.344	0.262	0.083
Isoquercetin	Flavonoid	Flavonol	0.007	0.737	0.728	0.743	0.647	0.411	0.386	0.333	0.288	0.154
Curcumin	Phenols		0.023	0.86	0.953	0.983	0.886	0.449	0.362	0.273	0.181	0.131
Hydroxysafflor yellow A	Flavonoid	Chalcone	-0.009	0.777	0.775	0.792	0.778	0.457	0.365	0.329	0.265	0.209
Sophocarpine	Alkaloid	Piperidine alkaloids	-0.073	0.868	0.789	0.813	0.734	0.367	0.34	0.309	0.258	0.127
Erucic acid	Ketones/aldehydes/acids		0.053	0.803	0.848	0.835	0.801	0.453	0.375	0.363	0.294	0.133
Ketoisophorone	Others		-0.004	0.812	0.841	0.842	0.804	0.474	0.383	0.349	0.271	0.113
Maslinic acid	Terpenoid	Triterpene	-0.042	0.796	0.71	0.733	0.655	0.453	0.43	0.438	0.378	0.155
cis-Isolimonenol	Terpenoid	Other monoterpenes	-0.021	0.88	0.82	0.793	0.802	0.73	0.454	0.403	0.371	0.137
L-Phenylalanine	Ketones/aldehydes/acids		-0.016	0.842	0.899	0.847	0.79	0.441	0.365	0.339	0.311	0.095
(E)-Cardamonin	Flavonoid	Chalcone	0.046	0.833	0.859	0.8	0.805	0.734	0.451	0.434	0.387	0.167
10-Deacetylbaccatin III	Terpenoid	Diterpene	-0.097	0.752	0.772	0.799	0.726	0.377	0.35	0.278	0.199	0.083
Dibutyl phthalate	Others		-0.097	0.752	0.78	0.76	0.688	0.372	0.33	0.278	0.204	0.08
Pseudoprotodioscin	Others		-0.103	0.825	0.766	0.735	0.642	0.358	0.326	0.274	0.192	0.068
Eugenol	Phenylpropanoids	simple phenylpropanoids	-0.092	0.719	0.765	0.775	0.752	0.379	0.324	0.277	0.209	0.079
Tectorigenin	Flavonoid	Isoflavone	-0.069	0.753	0.776	0.799	0.754	0.385	0.356	0.285	0.215	0.079
Dihydroergotoxine (mesylate)	Alkaloid	Indole alkaloids	-0.094	0.744	0.71	0.642	0.373	0.376	0.393	0.376	0.207	0.126
D-(+)-Trehalose	Carbohydrates		-0.09	0.947	0.958	0.92	0.874	0.522	0.347	0.324	0.255	0.103
Ginsenoside Rb3	Terpenoid	Triterpene	0.068	0.962	0.888	0.919	0.851	0.506	0.363	0.346	0.263	0.095
Ammonium glycyrrhizinate	Terpenoid	Triterpene	-0.041	0.944	0.891	0.896	0.857	0.663	0.361	0.34	0.265	0.08
β-Elemene	Terpenoid	Sesquiterpene	0.004	0.921	0.851	0.9	0.866	0.519	0.374	0.338	0.261	0.1
Ferulic acid	Phenylpropanoids	simple phenylpropanoids	-0.073	0.969	0.886	0.911	0.834	0.52	0.37	0.352	0.263	0.107
Ginkgetin	Flavonoid	Biflavone	-0.018	1.054	1.026	0.997	0.944	0.582	0.392	0.427	0.251	0.169
trans-Cinnamaldehyde	Phenylpropanoids	simple phenylpropanoids	0.004	0.908	0.957	0.924	0.959	0.678	0.521	0.487	0.507	0.32
Phytol	Terpenoid	Diterpene	-0.061	0.847	0.867	0.84	0.756	0.496	0.474	0.446	0.381	0.27
Sesamin	Phenylpropanoids	Lignan	-0.054	0.813	0.885	0.862	0.797	0.608	0.496	0.474	0.404	0.267
Dehydrodiisoeugenol	Phenylpropanoids	simple phenylpropanoids	0.136	0.92	0.934	0.884	0.748	0.583	0.484	0.474	0.397	0.262
Ginsenoside Rg5	Terpenoid	Triterpene	-0.043	0.888	0.93	0.861	0.756	0.608	0.476	0.473	0.421	0.28
Echinatin	Flavonoid	Chalcone	0.096	0.96	0.953	0.925	0.834	0.664	0.479	0.475	0.43	0.306
Mogroside V	Terpenoid	Triterpene	-0.041	0.817	0.806	0.725	0.81	0.625	0.45	0.436	0.4	0.205
Sinapine	Alkaloid	Other alkaloids	-0.04	0.78	0.758	0.697	0.652	0.661	0.477	0.432	0.399	0.207
Turanose	Carbohydrates		-0.064	0.737	0.73	0.645	0.64	0.666	0.465	0.433	0.417	0.176
Protodioscin	Steroids		-0.027	0.757	0.736	0.621	0.715	0.646	0.465	0.456	0.382	0.222
Tabersonine	Alkaloids	Indole alkaloids	0.102	0.731	0.724	0.673	0.633	0.55	0.483	0.473	0.393	0.22
Hexahydrocurcumin	Phenols		-0.035	0.844	0.825	0.769	0.732	0.655	0.485	0.475	0.404	0.243
Astramembrangenin	Terpenoids	Triterpenes	0.023	0.953	0.95	0.931	0.814	0.521	0.43	0.404	0.334	0.157
Periplocin	Steroids		-0.064	0.874	0.866	0.865	0.742	0.689	0.449	0.432	0.378	0.148
7-Amino-4-(trifluoromethyl)coumarin	Phenylpropanoids	Coumarins	-0.065	0.957	0.818	0.852	0.798	0.681	0.451	0.432	0.366	0.147
Maltol	Ketones/aldehydes/acids		-0.001	0.851	0.866	0.793	0.769	0.532	0.482	0.475	0.403	0.311
Elemicin	Phenylpropanoids	Simple phenylpropanoids	-0.055	0.935	0.847	0.862	0.785	0.641	0.454	0.444	0.372	0.181
Methyl syringate	Phenols		-0.069	0.894	0.848	0.885	0.796	0.714	0.474	0.46	0.392	0.213
1F-Fructofuranosylnystose	Carbohydrates		-0.186	0.784	0.613	0.692	0.647	0.538	0.075	0.048	0.022	0.01
Liquiritigenin	Flavonoids	Dihydroflavones	-0.201	0.69	0.644	0.623	0.621	0.526	0.053	0.033	0.014	0.001
Methyl Salicylate	Phenols		-0.186	0.789	0.724	0.646	0.69	0.609	0.076	0.048	0.029	0.015
Carnosic acid	Terpenoids	Diterpenes	-0.405	0.404	0.404	0.367	0.263	0.118	0.039	0.024	0.018	0.011
Wedelolactone	Phenylpropanoids	Coumarins	-0.11	0.761	0.754	0.763	0.719	0.486	0.086	0.079	0.074	0.073
Gallic acid	Phenols		-0.167	0.681	0.621	0.644	0.59	0.541	0.103	0.068	0.039	0.045
4'-Demethylpodophyllotoxin	Phenylpropanoids	Lignans	-0.007	0.952	0.928	0.901	0.739	0.573	0.447	0.481	0.346	0.152
20(R)-Ginsenoside Rg3	Terpenoids	Triterpenes	-0.036	0.94	0.912	0.88	0.815	0.637	0.458	0.441	0.344	0.139
Coumestrol	Phenylpropanoids	Coumarins	0.034	0.844	0.836	0.807	0.81	0.678	0.482	0.433	0.35	0.166
Glycycoumarin	Phenylpropanoids	Coumarins	-0.019	0.898	0.878	0.803	0.721	0.699	0.479	0.436	0.355	0.144
Protocatechualdehyde	Phenols		-0.019	0.756	0.787	0.739	0.654	0.511	0.486	0.463	0.415	0.322
Mogrol	Terpenoids	Triterpenes	0.054	0.898	0.877	0.878	0.86	0.671	0.46	0.455	0.365	0.176
Methyl Eugenol	Phenylpropanoids	Simple phenylpropanoids	-0.03	0.965	0.907	0.876	0.8	0.587	0.42	0.396	0.332	0.146
Umbelliferone	Phenylpropanoids	Coumarins	-0.05	0.918	0.903	0.863	0.725	0.669	0.42	0.399	0.331	0.136
Pseudoginsenoside F11	Terpenoids	Triterpenes	-0.018	0.978	0.847	0.873	0.75	0.671	0.404	0.385	0.316	0.11
i-Inositol	Others		-0.029	0.951	0.887	0.853	0.745	0.629	0.412	0.388	0.321	0.114
Oleuropein	Terpenoids	Iridoids	-0.029	0.951	0.886	0.88	0.736	0.46	0.399	0.38	0.309	0.118
DL-Menthol	Others		-0.033	0.938	0.873	0.911	0.786	0.616	0.439	0.425	0.33	0.144
Rehmannioside D	Terpenoids	Iridoids	-0.043	0.968	0.952	0.92	0.836	0.654	0.431	0.41	0.33	0.198
L-Chicoric Acid	Phenylpropanoids	Simple phenylpropanoids	-0.022	0.917	0.892	0.849	0.811	0.241	0.225	0.171	0.114	0.082
Ethyl gallate	Phenols		-0.011	0.829	0.93	0.787	0.774	0.482	0.421	0.409	0.394	0.215
Spiramycin	Antibiotics	Macrolides	-0.033	0.922	1.022	0.873	0.798	0.699	0.452	0.432	0.358	0.106
L-Lactic acid	Ketones/aldehydes/acids		-0.02	0.914	0.835	0.854	0.882	0.724	0.412	0.402	0.33	0.117
Ginsenoside Rh2	Terpenoids	Triterpenes	-0.043	0.872	0.836	0.861	0.7	0.404	0.397	0.281	0.17	0.091
Licochalcone D	Flavonoids	Chalcones	-0.353	0.473	0.489	0.475	0.46	0.394	0.397	0.421	0.311	0.112
2"-O-Galloylhyperin	Flavonoids	Flavonols	-0.045	0.868	0.845	0.848	0.69	0.109	0.072	0.058	0.049	0.048
Sclareolide	Terpenoids	Diterpenes	-0.123	0.758	0.74	0.723	0.688	0.453	0.396	0.352	0.263	0.064
Demethylsuberosin	Phenylpropanoids	Coumarins	-0.109	0.809	0.724	0.707	0.616	0.431	0.391	0.357	0.273	0.068
Neoandrographolide	Terpenoids	Diterpenes	-0.109	0.776	0.74	0.703	0.66	0.467	0.377	0.332	0.251	0.069
Crotonoside	Alkaloids	Other alkaloids	-0.059	0.744	0.683	0.751	0.714	0.427	0.411	0.352	0.275	0.082
Coumarin	Phenylpropanoids	Coumarins	-0.059	0.824	0.774	0.777	0.717	0.385	0.373	0.332	0.268	0.115
[8]-Shogaol	Phenols		0.011	0.806	0.778	0.782	0.715	0.389	0.359	0.339	0.267	0.091
Ethyl maltol	Ketones/aldehydes/acids		-0.07	0.85	0.675	0.684	0.643	0.385	0.351	0.373	0.287	0.125
L-Fucitol	Others		-0.076	0.81	0.757	0.76	0.695	0.419	0.357	0.342	0.272	0.092
4'-Hydroxychalcone	Flavonoids	Chalcones	-0.08	0.78	0.728	0.714	0.671	0.395	0.355	0.34	0.272	0.091
Panaxatriol	Terpenoids	Triterpenes	-0.086	0.889	0.796	0.778	0.756	0.409	0.389	0.37	0.3	0.12
1-Monomyristin	Ketones/aldehydes/acids		-0.055	0.789	0.771	0.754	0.674	0.397	0.37	0.353	0.255	0.11
Vindoline	Alkaloids	Indole alkaloids	-0.063	0.768	0.752	0.774	0.717	0.528	0.356	0.324	0.255	0.092
Cynaroside	Flavonoids	Flavones	-0.038	0.728	0.691	0.656	0.486	0.367	0.34	0.323	0.29	0.153
Trans-Anethole	Phenylpropanoids	Simple phenylpropanoids	-0.074	0.785	0.764	0.777	0.68	0.372	0.342	0.315	0.256	0.074
Methyl deacetylasperulosidate	Terpenoids	Iridoids	-0.064	0.858	0.768	0.775	0.707	0.389	0.355	0.315	0.253	0.071
Sciadopitysin	Flavonoids	Biflavones	-0.028	0.885	0.885	0.846	0.822	0.498	0.399	0.357	0.276	0.106
Alpinetin	Flavonoids	Dihydroflavones	-0.029	0.781	0.78	0.77	0.751	0.376	0.364	0.326	0.252	0.084
Nootkatone	Terpenoids	Sesquiterpenes	-0.035	0.782	0.769	0.76	0.699	0.38	0.355	0.321	0.252	0.076
3-Butylidenephthalide	Others		-0.04	0.763	0.772	0.756	0.711	0.375	0.326	0.312	0.239	0.06
Xanthoxylin	Phenols		-0.069	0.814	0.767	0.757	0.728	0.379	0.344	0.329	0.252	0.076
Loganin	Terpenoids	Iridoids	-0.054	0.742	0.756	0.772	0.729	0.392	0.344	0.325	0.25	0.073
Herniarin	Phenylpropanoids	Coumarins	-0.046	0.756	0.764	0.769	0.742	0.414	0.369	0.344	0.275	0.113
Angoroside C	Phenylpropanoids	Simple phenylpropanoids	-0.004	0.858	0.836	0.855	0.818	0.457	0.404	0.376	0.31	0.124
L-Carnitine	Others		-0.046	1.002	0.771	0.796	0.791	0.744	0.377	0.358	0.294	0.131
Isoliensinine	Alkaloids	Isoquinoline alkaloids	-0.083	0.841	0.641	0.585	0.574	0.457	0.423	0.411	0.353	0.123
Caryophyllene oxide	Terpenoids	Sesquiterpenes	0.112	0.974	0.95	0.849	0.834	0.794	0.465	0.45	0.368	0.151
1-Deoxynojirimycin	Alkaloids	Piperidine alkaloids	-0.04	0.847	0.853	0.749	0.795	0.77	0.446	0.427	0.378	0.153
Tenuigenin	Terpenoids	Triterpenes	-0.016	0.926	0.892	0.869	0.875	0.804	0.455	0.433	0.376	0.144
Berberine (chloride hydrate)	Alkaloids	Isoquinoline alkaloids	-0.052	0.898	0.838	0.787	0.783	0.739	0.418	0.397	0.332	0.273
Geniposidic acid	Terpenoids	Iridoids	-0.071	0.845	0.904	0.843	0.8	0.78	0.428	0.407	0.347	0.137
(20S)-Protopanaxatriol	Terpenoids	Triterpenes	0.057	0.83	0.902	0.783	0.745	0.425	0.407	0.401	0.344	0.126
Naringenin	Flavonoids	Dihydroflavones	0.118	0.949	0.886	0.848	0.868	0.79	0.462	0.442	0.371	0.14
Hesperidin	Flavonoids	Dihydroflavones	0.044	0.866	0.832	0.845	0.824	0.57	0.499	0.475	0.384	0.134
Genipin	Terpenoids	Iridoids	0.184	0.935	0.913	0.914	0.91	0.741	0.585	0.532	0.426	0.179
Ginsenoside Rd	Terpenoids	Triterpenes	-0.062	0.802	0.75	0.793	0.782	0.52	0.501	0.485	0.398	0.336
Tyrosol	Phenols		-0.062	0.835	0.919	0.798	0.786	0.595	0.513	0.473	0.378	0.134
4,4'-Dimethoxychalcone	Flavonoids	Chalcones	-0.016	0.816	0.86	0.822	0.803	0.571	0.509	0.475	0.358	0.14
Sesamoside	Terpenoids	Iridoids	0.001	0.872	0.884	0.867	0.843	0.615	0.513	0.473	0.373	0.131
Hexadecanedioic acid	Ketones/aldehydes/acids		0.08	0.888	0.864	0.861	0.824	0.475	0.489	0.452	0.345	0.135
Chikusetsusaponin Iva	Terpenoids	Triterpenes	0.045	0.85	0.936	0.809	0.772	0.518	0.5	0.476	0.361	0.128
4,5-Dicaffeoylquinic acid	Ketones/aldehydes/acids		0.059	0.855	0.833	0.834	0.843	0.426	0.329	0.279	0.224	0.185
2-Hydroxyphenylacetic acid	Phenols		0.053	0.99	0.823	0.795	0.798	0.543	0.482	0.446	0.337	0.111
Tectochrysin	Flavonoids	Flavones	0.012	0.861	0.835	0.812	0.808	0.47	0.498	0.407	0.377	0.124
20(S)-Ginsenoside Rg3	Terpenoids	Triterpenes	0.188	0.924	0.908	0.877	0.845	0.502	0.556	0.257	0.194	0.09
Mulberroside A	Stilbenoids		-0.011	0.815	0.785	0.822	0.778	0.469	0.405	0.331	0.235	0.103
Tetramethylpyrazine	Others		-0.023	0.736	0.796	0.768	0.763	0.431	0.394	0.321	0.232	0.205
Cinnamic acid	Phenylpropanoids	Simple phenylpropanoids	-0.008	0.817	0.82	0.807	0.782	0.452	0.419	0.335	0.241	0.106
Hippuric acid	Ketones/aldehydes/acids		-0.003	0.837	0.821	0.839	0.76	0.471	0.415	0.342	0.236	0.095
Parishin	Terpenoids	Other terpenoids	-0.007	0.853	0.842	0.871	0.784	0.455	0.418	0.349	0.244	0.101
Propyl gallate	Phenols		0.026	0.82	0.83	0.822	0.79	0.533	0.438	0.42	0.352	0.221
Isovanillin	Ketones/aldehydes/acids		0.037	1	0.811	0.885	0.804	0.595	0.359	0.317	0.263	0.242
Anacardic Acid	Ketones/aldehydes/acids		0.086	0.916	0.91	0.915	0.839	0.695	0.409	0.358	0.283	0.122
Gentiopicroside	Terpenoids	Iridoids	0.023	0.902	0.881	0.909	0.889	0.674	0.376	0.33	0.259	0.126
Astragaloside IV	Terpenoids	Triterpenes	0.023	0.923	0.895	0.892	0.834	0.584	0.414	0.356	0.279	0.123
Gastrodin	Phenols		-0.213	0.648	0.633	0.675	0.634	0.251	0.141	0.071	0.034	0.016
2-Furoic acid	Ketones/aldehydes/acids		-0.191	0.749	0.651	0.69	0.606	0.281	0.173	0.102	0.058	0.036
4'-O-Methylbavachalcone	Flavonoids	Chalcones	-0.19	0.641	0.652	0.628	0.591	0.337	0.146	0.085	0.052	0.025
Astragalin	Flavonoids	Flavonols	-0.2	0.67	0.692	0.707	0.675	0.316	0.157	0.1	0.055	0.032
Sweroside	Terpenoids	Iridoids	0.05	0.796	0.953	0.8	0.809	0.472	0.471	0.436	0.304	0.113
Licochalcone B	Flavonoids	Chalcones	0.059	0.788	0.765	0.795	0.635	0.58	0.563	0.449	0.461	0.16
Syringic acid	Phenols		0.042	0.978	0.796	0.804	0.701	0.486	0.484	0.436	0.388	0.11
4-Methylherniarin	Phenylpropanoids	Coumarins	0.009	0.79	0.819	0.791	0.77	0.563	0.474	0.447	0.339	0.118
Daurisoline	Alkaloids	Isoquinoline alkaloids	0.004	0.688	0.916	0.639	0.485	0.444	0.433	0.399	0.31	0.092
Methylnissolin-3-O-glucoside	Flavonoids	Other flavonoids	0.009	0.855	0.854	0.819	0.817	0.503	0.474	0.432	0.311	0.109
Maltotriose	Carbohydrates		-0.022	0.91	0.954	0.777	0.818	0.646	0.454	0.377	0.301	0.088
Vanillyl alcohol	Phenols		0.011	0.909	0.944	0.843	0.862	0.491	0.471	0.421	0.31	0.114
(±)-Equol	Phenols	Monophenols	0.031	0.735	0.826	0.796	0.732	0.441	0.396	0.376	0.291	0.131
Fucoxanthin	Others		-0.074	0.74	0.733	0.758	0.74	0.41	0.388	0.344	0.281	0.117
Caffeic acid phenethyl ester	Phenylpropanoids	Simple phenylpropanoids	-0.141	0.74	0.651	0.646	0.54	0.412	0.405	0.324	0.27	0.137
Nystose	Carbohydrates		-0.081	0.74	0.887	0.752	0.793	0.467	0.384	0.328	0.261	0.101
Isofraxidin	Phenylpropanoids	Coumarins	-0.026	0.748	0.81	0.804	0.783	0.477	0.383	0.341	0.267	0.094
Hydroxytyrosol	Phenols		-0.034	0.798	0.758	0.719	0.708	0.352	0.466	0.471	0.281	0.073
Salicyl alcohol	Phenols		-0.058	0.983	0.825	0.827	0.819	0.512	0.414	0.379	0.306	0.091
Andrographolide	Terpenoids	Diterpenes	-0.049	0.86	0.829	0.817	0.799	0.612	0.413	0.364	0.281	0.081
Methyl cinnamate	Phenylpropanoids	Simple phenylpropanoids	-0.067	0.806	0.795	0.825	0.748	0.584	0.378	0.35	0.267	0.08
Dencichine	Others		-0.061	0.833	0.812	0.831	0.781	0.631	0.386	0.359	0.267	0.078
Helicid	Ketones/aldehydes/acids		-0.079	0.893	0.841	0.801	0.77	0.481	0.372	0.342	0.261	0.074
Fructose	Phenylpropanoids	Coumarins	-0.063	0.892	0.923	0.832	0.821	0.45	0.403	0.349	0.278	0.104
Puerarin	Flavonoids	Isoflavones	-0.12	0.856	0.821	0.762	0.794	0.58	0.409	0.379	0.31	0.129
Methyl protodioscin	Steroids		-0.103	0.859	0.833	0.776	0.747	0.468	0.398	0.361	0.286	0.116
Morin	Flavonoids	Flavonols	-0.026	0.882	0.817	0.854	0.798	0.506	0.376	0.352	0.256	0.104
Crocin	Terpenoids	Diterpenes	-0.061	0.89	0.848	0.829	0.813	0.66	0.388	0.344	0.269	0.102
Biochanin A	Flavonoids	Isoflavones	-0.002	0.825	0.756	0.775	0.752	0.413	0.36	0.331	0.241	0.088
Diacerein	Quinones	Anthraquinones	-0.001	0.872	0.862	0.857	0.795	0.553	0.452	0.36	0.271	0.095
Pinocembrin	Flavonoids	Dihydroflavones	0.045	0.861	0.799	0.784	0.861	0.477	0.434	0.409	0.293	0.15
Kaempferol	Flavonoids	Flavonols	0.082	0.874	0.835	0.867	0.822	0.727	0.444	0.404	0.329	0.147
Piperine	Alkaloids	Piperidine alkaloids	-0.008	0.805	0.733	0.781	0.799	0.482	0.416	0.376	0.322	0.122
10-Gingerol	Others		0.131	0.825	0.818	0.842	0.773	0.501	0.44	0.418	0.332	0.126
Flavokawain A	Flavonoids	Chalcones	0.127	0.912	0.808	0.851	0.811	0.796	0.446	0.444	0.329	0.137
2-Methoxycinnamic acid	Phenylpropanoids	Simple phenylpropanoids	0.022	0.898	0.93	0.868	0.805	0.546	0.435	0.391	0.328	0.129
Mangiferin	Phenols	Xanthones	0.014	0.833	0.806	0.772	0.793	0.675	0.473	0.461	0.441	0.229
Oroxin B	Flavonoids	Flavonols	0.001	0.872	0.84	0.877	0.868	0.47	0.404	0.383	0.293	0.126
Levistolide A	Others		-0.01	0.734	0.865	0.838	0.825	0.739	0.444	0.404	0.305	0.148
Maltitol	Carbohydrates		0.006	0.847	0.835	0.854	0.847	0.544	0.435	0.423	0.306	0.157
5-O-Demethylnobiletin	Flavonoids	Flavonols	0.023	1.03	0.91	0.862	0.872	0.869	0.676	0.432	0.353	0.172
Perillyl alcohol	Terpenoids	Other monoterpenes	0.006	0.923	0.951	0.876	0.839	0.493	0.439	0.443	0.377	0.199
p-Coumaric acid	Phenylpropanoids	Simple phenylpropanoids	0.016	0.897	0.811	0.883	0.816	0.832	0.49	0.452	0.378	0.047
Transcrocetin meglumine salt	Terpenoids	Diterpenes	0.02	0.857	0.866	0.889	0.856	0.826	0.505	0.435	0.374	0.017
Erianin	Others		0.001	0.938	0.917	0.846	0.848	0.68	0.471	0.405	0.357	0.014
Stearyl glycyrrhetinate	Terpenoids	Other terpenoids	0.026	0.905	0.801	0.877	0.865	0.767	0.458	0.426	0.37	0.079
Abietic acid	Terpenoids	Diterpenes	0.116	0.884	0.837	0.872	0.876	0.801	0.471	0.443	0.356	0.121
Ingenol	Terpenoids	Diterpenes	0.006	0.965	0.904	0.88	0.846	0.703	0.47	0.446	0.371	0.144
Soyasapogenol B	Terpenoids	Triterpenes	0.002	0.892	0.86	0.797	0.821	0.616	0.419	0.395	0.375	0.098
3'-Methoxypuerarin	Flavonoids	Isoflavones	-0.024	0.856	0.854	0.835	0.815	0.604	0.422	0.417	0.387	0.111
Tangeretin	Flavonoids	Flavonols	-0.014	0.898	0.73	0.796	0.793	0.578	0.376	0.365	0.299	0.101
Schisandrol B	Phenylpropanoids	Lignans	-0.015	0.855	0.76	0.793	0.808	0.658	0.376	0.354	0.299	0.1
2'-Hydroxyacetophenone	Ketones/aldehydes/acids		-0.019	0.895	0.755	0.801	0.804	0.466	0.374	0.36	0.335	0.101
Phloretin	Flavonoids	Dihydrochalcones	-0.004	0.859	0.812	0.834	0.843	0.716	0.4	0.385	0.299	0.111
Methyl 2-furoate	Others		-0.002	0.848	0.84	0.881	0.85	0.644	0.425	0.412	0.391	0.138
Nobiletin	Flavonoids	Flavonols	0.017	0.887	0.881	0.828	0.813	0.64	0.403	0.395	0.373	0.148
Raspberry ketone	Phenols		0.083	0.775	0.804	0.788	0.774	0.481	0.38	0.38	0.352	0.129
Mogroside IV-A	Terpenoids	Triterpenes	-0.009	0.844	0.851	0.774	0.777	0.61	0.396	0.379	0.352	0.133
Kuromanin (chloride)	Flavonoids	Anthocyanins	0.039	0.89	0.882	0.722	0.776	0.596	0.524	0.491	0.439	0.252
Mogroside III-E	Terpenoids	Triterpenes	-0.01	0.836	0.819	0.803	0.803	0.618	0.406	0.407	0.384	0.163
Myristic acid	Ketones/aldehydes/acids		0.002	0.875	0.86	0.451	0.432	0.426	0.406	0.381	0.364	0.109
Kavain	Others		-0.006	0.858	0.84	0.784	0.792	0.509	0.378	0.369	0.345	0.106
Sulforaphene	Others		-0.086	0.786	0.803	0.728	0.705	0.342	0.347	0.344	0.316	0.098
Mogroside IIe	Terpenoids	Triterpenes	0.02	0.862	0.855	0.79	0.779	0.496	0.368	0.365	0.343	0.092
Yangonin	Phenylpropanoids	Other phenylpropanoids	-0.159	0.65	0.702	0.667	0.666	0.395	0.205	0.142	0.077	0.077
Asperuloside	Terpenoids	Iridoids	-0.208	0.759	0.689	0.688	0.677	0.34	0.175	0.114	0.056	0.024
Bergapten	Phenylpropanoids	Coumarins	-0.184	0.701	0.681	0.695	0.687	0.396	0.222	0.157	0.104	0.08
Rhamnetin	Flavonoids	Flavonols	-0.201	0.682	0.708	0.53	0.678	0.329	0.192	0.122	0.06	0.037
Diosgenin	Steroids		-0.085	0.742	0.769	0.743	0.75	0.376	0.153	0.083	0.036	0.016
Schisantherin B	Phenylpropanoids	Lignans	-0.166	0.711	0.489	0.626	0.561	0.343	0.153	0.06	0.029	0.014
Rebaudioside C	Terpenoids	Diterpenes	0.004	0.72	0.717	0.702	0.744	0.703	0.32	0.21	0.14	0.103
Ginsenoside Ro	Terpenoids	Triterpenes	0.001	0.739	0.815	0.717	0.756	0.672	0.347	0.239	0.168	0.124
β-Elemonic acid	Terpenoids	Triterpenes	0	0.739	0.706	0.717	0.693	0.656	0.402	0.211	0.15	0.117
Sinigrin	Alkaloids	Other alkaloids	0.003	0.732	0.738	0.76	0.775	0.743	0.384	0.225	0.168	0.123
Ganoderic acid D	Terpenoids	Triterpenes	-0.208	0.676	0.725	0.64	0.671	0.438	0.134	0.078	0.04	0.026
Byakangelicin	Phenylpropanoids	Coumarins	-0.215	0.599	0.639	0.651	0.675	0.324	0.115	0.073	0.036	0.024
Tetrahydrocurcumin	Phenols		-0.188	0.636	0.66	0.605	0.619	0.295	0.128	0.075	0.053	0.02
Coniferyl ferulate	Phenylpropanoids	Simple phenylpropanoids	-0.202	0.756	0.634	0.601	0.655	0.348	0.121	0.09	0.052	0.027
γ-Tocopherol	Phenols		-0.225	0.574	0.552	0.533	0.603	0.385	0.144	0.098	0.065	0.042
Sclareol	Terpenoids	Diterpenes	-0.256	0.489	0.511	0.548	0.518	0.189	0.107	0.058	0.02	0.006
Barlerin	Terpenoids	Iridoids	-0.191	0.632	0.624	0.61	0.579	0.436	0.122	0.084	0.048	0.029
Tetrahydropalmatine	Alkaloids	Isoquinoline alkaloids	-0.231	0.621	0.6	0.635	0.588	0.361	0.104	0.064	0.021	0.002
(E)-Methyl 4-coumarate	Phenylpropanoids	Other phenylpropanoids	-0.234	0.601	0.623	0.656	0.56	0.374	0.128	0.073	0.036	0.017
Dracorhodin perchlorate	Others		-0.188	0.569	0.605	0.612	0.605	0.266	0.105	0.065	0.022	0.009
Cyanidin-3-O-galactoside (chloride)	Flavonoids	Anthocyanins	-0.156	0.725	0.754	0.81	0.734	0.443	0.239	0.21	0.131	0.072
Mogroside III	Terpenoids	Triterpenes	-0.178	0.749	0.604	0.623	0.692	0.522	0.131	0.088	0.047	0.031
(-)-Syringaresnol-4-O-β-D-apiofuranosyl-(1→2)-β-D-glucopyranoside	Phenylpropanoids	Lignans	-0.175	0.643	0.628	0.646	0.59	0.522	0.144	0.087	0.058	0.038
Syringin	Phenylpropanoids	Simple phenylpropanoids	-0.21	0.85	0.613	0.623	0.67	0.497	0.124	0.072	0.035	0.011
Dihydrocurcumin	Phenols		-0.131	0.715	0.644	0.701	0.708	0.538	0.157	0.118	0.08	0.054
Mogroside I A1	Terpenoids	Triterpenes	-0.206	0.644	0.543	0.638	0.655	0.452	0.118	0.076	0.031	0.006
(-)-Menthol	Terpenoids	Other monoterpenes	-0.201	0.715	0.63	0.735	0.742	0.495	0.132	0.088	0.04	0.016
(S)-Indoximod	Ketones/aldehydes/acids		-0.199	0.797	0.738	0.667	0.731	0.424	0.132	0.07	0.039	0.017
Nomilin	Terpenoids	Triterpenes	-0.201	0.698	0.657	0.671	0.714	0.448	0.12	0.072	0.035	0.012
β-Carotene	Terpenoids	Other terpenoids	-0.157	0.628	0.725	0.734	0.693	0.358	0.123	0.076	0.032	0.02
3'-Hydroxypuerarin	Flavonoids	Isoflavones	-0.196	0.663	0.644	0.668	0.608	0.392	0.168	0.112	0.065	0.038
Dauricine	Alkaloids	Isoquinoline alkaloids	-0.226	0.52	0.51	0.508	0.29	0.168	0.124	0.074	0.045	0.027
Mogroside II-A2	Terpenoids	Triterpenes	-0.217	0.63	0.641	0.673	0.674	0.45	0.123	0.073	0.038	0.019
Ginsenoside Rk3	Terpenoids	Triterpenes	-0.106	0.665	0.619	0.657	0.589	0.318	0.131	0.079	0.045	0.028
3-O-Methylgalangin	Flavonoids	Flavonols	-0.184	0.729	0.732	0.699	0.702	0.534	0.182	0.133	0.094	0.062
Ginkgolic acid C17:1	Ketones/aldehydes/acids		-0.145	0.643	0.653	0.672	0.65	0.437	0.146	0.109	0.063	0.04
Astragaloside III	Terpenoids	Triterpenes	-0.232	0.693	0.642	0.754	0.655	0.246	0.135	0.077	0.023	0.012
Pogostone	Others		-0.17	0.652	0.642	0.668	0.638	0.225	0.144	0.091	0.034	0.018
7,4'-Dihydroxyflavone	Flavonoids	Flavonols	-0.209	0.687	0.657	0.689	0.658	0.307	0.163	0.076	0.043	0.068
Ginsenoside Rg6	Terpenoids	Triterpenes	-0.201	0.592	0.567	0.614	0.602	0.244	0.155	0.096	0.052	0.026
Oxysophocarpine	Ketones/aldehydes/acids		-0.227	0.748	0.645	0.618	0.598	0.263	0.154	0.102	0.046	0.021
(-​)​-Maackiain	Terpenoids	Diterpenes	-0.206	0.663	0.626	0.638	0.603	0.263	0.189	0.114	0.054	0.032
Ginsenoside Rf	Terpenoids	Triterpenes	-0.208	0.644	0.595	0.675	0.667	0.241	0.114	0.059	0.018	0
Mogroside IV	Terpenoids	Triterpenes	-0.211	0.713	0.604	0.661	0.644	0.199	0.112	0.056	0.023	0.007
Ginsenoside Rb1	Terpenoids	Triterpenes	-0.214	0.657	0.603	0.639	0.648	0.313	0.114	0.062	0.022	0.007
4'-O-Methylochnaflavone	Flavonoids	Biflavones	-0.199	0.692	0.632	0.697	0.673	0.326	0.119	0.068	0.033	0.018
Apocynin	Ketones/aldehydes/acids		-0.188	0.667	0.597	0.654	0.671	0.217	0.128	0.086	0.04	0.019
Platycodin D2	Terpenoids	Triterpenes	-0.188	0.602	0.554	0.584	0.565	0.193	0.128	0.084	0.041	0.028
20(R)-Ginsenoside Rh2	Terpenoids	Triterpenes	-0.2	0.439	0.461	0.398	0.363	0.181	0.091	0.04	0.018	0.006
Methyl Paraben	Phenols		-0.193	0.653	0.682	0.637	0.633	0.232	0.106	0.051	0.023	-0.001
Berbamine (dihydrochloride)	Alkaloids	Isoquinoline alkaloids	-0.211	0.452	0.445	0.279	0.164	0.106	0.06	0.021	0.008	-0.005
L-Arabinitol	Carbohydrates		-0.192	0.677	0.654	0.663	0.603	0.29	0.116	0.065	0.035	0.008
Sinapinic acid	Phenylpropanoids	Simple phenylpropanoids	-0.206	0.688	0.671	0.597	0.684	0.394	0.13	0.08	0.051	0.036
Phloracetophenone	Phenols		-0.183	0.728	0.669	0.673	0.745	0.423	0.122	0.067	0.046	0.035
Galangin	Flavonoids	Flavonols	-0.104	0.578	0.613	0.616	0.598	0.232	0.12	0.086	0.056	0.026
Asaraldehyde	Ketones/aldehydes/acids		-0.209	0.589	0.663	0.646	0.658	0.392	0.127	0.079	0.037	0.024
D(+)-Raffinose (pentahydrate)	Carbohydrates		-0.212	0.679	0.662	0.649	0.698	0.391	0.118	0.068	0.03	0.011
3-Methyl-L-histidine	Ketones/aldehydes/acids		-0.195	0.708	0.72	0.682	0.695	0.416	0.192	0.105	0.052	0.029
Complanatuside	Flavonoids	Flavonols	-0.183	0.65	0.62	0.584	0.567	0.477	0.059	0.034	0.023	0.008
p-Hydroxycinnamic acid	Phenols		-0.181	0.74	0.629	0.655	0.621	0.574	0.071	0.039	0.03	0.018
Octahydrocurcumin	Ketones/aldehydes/acids		-0.186	0.673	0.568	0.617	0.605	0.557	0.061	0.032	0.02	0.003
Ginsenoside Re	Phenols		-0.182	0.763	0.629	0.581	0.668	0.564	0.087	0.04	0.016	0.003
6-Hydroxy-4-methylcoumarin	Terpenoids	Triterpenes	-0.433	0.41	0.354	0.296	0.287	-0.113	-0.175	-0.207	-0.23	-0.244
Morroniside	Phenylpropanoids	Coumarins	-0.418	0.466	0.395	0.37	0.336	-0.064	-0.162	-0.205	-0.223	-0.228
Vanillin	Terpenoids	Iridoids	-0.412	0.414	0.429	0.378	0.379	0.025	-0.163	-0.198	-0.218	-0.23
[6]-Gingerol	Ketones/aldehydes/acids		-0.435	0.433	0.407	0.373	0.381	0.012	-0.155	-0.206	-0.222	-0.236
Sodium citrate (dihydrate)	Phenols		-0.513	0.335	0.334	0.292	0.257	-0.098	-0.244	-0.28	-0.306	-0.319
Bilobalide	Ketones/aldehydes/acids		-0.401	0.456	0.447	0.416	0.417	0.05	-0.132	-0.167	-0.203	-0.209
Patchouli alcohol	Terpenoids	Sesquiterpenes	-0.147	0.727	0.708	0.684	0.575	0.207	0.054	0.037	0.036	0.011
Neferine	Terpenoids	Sesquiterpenes	-0.208	0.505	0.401	0.465	0.244	0.044	0.008	-0.011	-0.03	-0.03
Demethoxycurcumin	Alkaloids	Alkaloid dimers	-0.218	0.598	0.618	0.56	0.491	0.177	-0.012	-0.004	-0.012	-0.016
Amygdalin	Phenols		-0.173	0.706	0.65	0.64	0.513	0.295	0.062	0.038	0.021	0.016
Ginsenoside Rb2	Alkaloids	Other alkaloids	-0.38	0.369	0.315	0.306	0.248	-0.04	-0.112	-0.139	-0.162	-0.164
Genkwanin	Terpenoids	Triterpenes	-0.345	0.494	0.486	0.496	0.487	0.07	-0.132	-0.152	-0.168	-0.172
Shikonin	Flavonoids	Flavonols	-0.333	0.55	0.522	0.468	0.419	0.279	0.135	0.125	0.112	0.096
Sinapine (thiocyanate)	Quinones	Naphthoquinones	-0.208	0.736	0.744	0.674	0.695	0.596	0.032	0.006	-0.013	-0.028
2,5-Dihydroxybenzoic acid	Alkaloids	Other alkaloids	-0.194	0.674	0.775	0.622	0.621	0.489	0.025	0.011	-0.001	-0.016
Genipin 1-β-D-gentiobioside	Phenols		-0.442	0.457	0.51	0.439	0.376	0.364	-0.194	-0.224	-0.235	-0.246
Panaxadiol	Terpenoids	Iridoids	-0.463	0.284	0.28	0.292	0.307	0.099	-0.248	-0.263	-0.279	-0.292
L-Arginine	Terpenoids	Triterpenes	-0.209	0.784	0.612	0.632	0.576	0.406	0.027	0.01	-0.021	-0.03
Poricoic acid A	Others		-0.189	0.63	0.602	0.593	0.593	0.247	0.045	0.029	0.012	0.008
Danshensu	Terpenoids	Triterpenes	-0.349	0.474	0.446	0.425	0.425	0.063	-0.106	-0.14	-0.173	-0.19
Pyridoxine (hydrochloride)	Phenylpropanoids	Simple phenylpropanoids	-0.185	0.712	0.661	0.567	0.584	0.236	0.04	0.019	0.009	0.001
Ginsenoside Rg1	Alkaloids	Pyridine alkaloids	-0.42	0.503	0.427	0.385	0.394	0.022	-0.162	-0.205	-0.215	-0.225
Veratridine	Terpenoids	Triterpenes	-0.397	0.457	0.364	0.358	0.353	0.014	-0.195	-0.218	-0.227	-0.236
Monocrotaline	Alkaloids	Isoquinoline alkaloids	-0.406	0.405	0.402	0.38	0.41	0.056	-0.182	-0.198	-0.218	-0.221
Acetosyringone	Alkaloids	Pyrrole alkaloids	-0.564	0.422	0.306	0.25	0.285	-0.108	-0.305	-0.322	-0.339	-0.343
Tylosin (tartrate)	Ketones/aldehydes/acids		-0.569	0.221	0.218	0.2	0.182	0.012	-0.04	-0.052	-0.073	-0.072
D-(+)-Trehalose dihydrate	Antibiotics	Macrolides	-0.423	0.499	0.474	0.381	0.391	-0.041	-0.202	-0.217	-0.229	-0.238
Sucrose	Carbohydrates		-0.19	0.719	0.628	0.583	0.598	0.229	0.058	0.034	0.014	0.012
Vanillic acid	Carbohydrates		-0.221	0.62	0.602	0.547	0.572	0.181	-0.007	-0.017	-0.037	-0.043
Esculetin	Ketones/aldehydes/acids		-0.202	0.624	0.616	0.61	0.579	0.39	0.037	0.053	0.021	0.002
p-Anisic acid	Phenylpropanoids	Coumarins	-0.359	0.586	0.474	0.456	0.129	-0.118	-0.162	-0.188	-0.205	-0.204
Irisflorentin	Ketones/aldehydes/acids		-0.206	0.565	0.594	0.618	0.405	0.047	0.011	-0.026	-0.037	-0.037
Genistin	Flavonoids	Isoflavones	-0.333	0.562	0.546	0.475	0.289	-0.075	-0.115	-0.138	-0.155	-0.158
Liquiritin	Flavonoids	Isoflavones	-0.292	0.611	0.57	0.524	0.286	-0.001	-0.047	-0.081	-0.098	-0.097
Rhynchophylline	Flavonoids	Dihydroflavones	-0.338	0.524	0.491	0.406	0.053	-0.063	-0.098	-0.122	-0.138	-0.138
Anethole	Alkaloids	Indole alkaloids	-0.181	0.67	0.698	0.61	0.391	0.057	0.03	0.011	-0.012	-0.01
Kaempferide	Phenylpropanoids	Simple phenylpropanoids	-0.129	0.755	0.702	0.711	0.584	0.094	0.074	0.061	0.047	0.051
Xanthotoxol	Flavonoids	Flavonols	-0.225	0.644	0.622	0.531	0.402	0.014	-0.003	-0.011	-0.028	-0.026
Coumarin-3-carboxylic Acid	Phenylpropanoids	Coumarins	-0.162	0.728	0.642	0.637	0.584	0.07	0.048	0.03	0.009	0.013
Dihydroferulic acid	Phenylpropanoids	Coumarins	-0.203	0.752	0.631	0.62	0.412	0.033	0.02	-0.007	-0.017	-0.02
Aminophylline	Ketones/aldehydes/acids		-0.175	0.788	0.675	0.632	0.464	0.062	0.028	0.011	-0.002	0
Suberosin	Others		-0.198	0.617	0.54	0.546	0.316	0.07	0.04	0.017	-0.002	0.002
Ginkgolide B	Phenylpropanoids	Coumarins	-0.17	0.736	0.658	0.622	0.622	0.287	0.061	0.042	0.021	0.021
Zearalenone	Terpenoids	Diterpenes	-0.354	0.539	0.559	0.539	0.523	0.164	0.026	0.002	-0.022	-0.023
Cinnamoylglycine	Ketones/aldehydes/acids		-0.172	0.764	0.671	0.617	0.633	0.335	0.062	0.038	0.018	0.013
Quercetin	Ketones/aldehydes/acids		-0.402	0.472	0.44	0.472	0.446	0.178	-0.157	-0.194	-0.222	-0.23
5,7-Dihydroxy-4-methylcoumarin	Flavonoids	Flavonols	-0.21	0.663	0.654	0.587	0.598	0.354	0.033	0.014	-0.005	-0.015
Momordin Ic	Phenylpropanoids	Coumarins	-0.188	0.696	0.692	0.537	0.645	0.514	0.085	0.038	0.017	0.01
Linalool	Terpenoids	Triterpenes	-0.233	0.654	0.661	0.567	0.623	0.257	0.073	0.04	0.015	0.005
Zingerone	Terpenoids	Other monoterpenes	-0.18	0.618	0.674	0.642	0.622	0.3	0.079	0.05	0.027	0.019
Tridecanoic acid	Ketones/aldehydes/acids		-0.194	0.584	0.674	0.514	0.429	0.144	0.118	0.048	0.015	0.007
Homogentisic acid	Ketones/aldehydes/acids		-0.275	0.461	0.517	0.49	0.485	0.156	0	-0.034	-0.042	-0.043
7beta-Hydroxylathyrol	Ketones/aldehydes/acids		-0.505	0.326	0.389	0.312	0.312	0.036	-0.247	-0.28	-0.308	-0.315
Parthenolide	Terpenoids	Diterpenes	-0.196	0.536	0.648	0.623	0.603	0.385	0.067	0.034	0.005	-0.001
Isosilybin	Terpenoids	Sesquiterpenes	-0.138	0.678	0.687	0.713	0.628	0.227	0.179	0.12	0.06	0.022
Spinosin	Flavonoids	Dihydroflavonols	-0.158	0.637	0.842	0.697	0.459	0.208	0.176	0.11	0.044	0.018
Geniposide	Flavonoids	Flavonols	-0.157	0.665	0.657	0.698	0.55	0.197	0.153	0.095	0.033	0.006
Aloperine	Terpenoids	Iridoids	-0.216	0.658	0.811	0.632	0.258	0.196	0.172	0.094	0.043	0.014
Homoplantaginin	Alkaloids	Piperidine alkaloids	-0.216	0.809	0.758	0.739	0.592	0.195	0.128	0.07	0.02	0.013
Aurantio-obtusin	Flavonoids	Flavonols	-0.019	0.744	0.708	0.752	0.581	0.2	0.172	0.102	0.046	0.024
4-Methoxybenzaldehyde	Quinones	Anthraquinones	-0.185	0.758	0.725	0.673	0.645	0.197	0.162	0.096	0.033	0.012
Shionone	Ketones/aldehydes/acids		-0.16	0.818	0.897	0.589	0.639	0.194	0.154	0.068	0.03	0.007
Hydroxy-α-sanshool	Terpenoids	Triterpenes	-0.172	0.78	0.82	0.642	0.468	0.192	0.142	0.077	0.018	-0.001
Glycyrrhizic acid	Alkaloids	Other alkaloids	-0.178	0.732	0.852	0.691	0.27	0.232	0.166	0.082	0.033	0.005
4-Methylesculetin	Terpenoids	Triterpenes	-0.191	0.79	0.877	0.696	0.41	0.268	0.224	0.189	0.142	0.048
Methyl vanillate	Phenylpropanoids	Coumarins	-0.203	0.847	0.703	0.674	0.399	0.197	0.175	0.111	0.035	0.022
Dipotassium glycyrrhizinate	Others		-0.16	0.817	0.871	0.628	0.483	0.184	0.146	0.083	0.034	0.01
Berberine (chloride)	Terpenoids	Triterpenes	-0.188	0.583	0.675	0.577	0.301	0.193	0.144	0.077	0.032	0.021
Kaempferitrin	Alkaloids	Isoquinoline alkaloids	-0.131	0.809	0.697	0.67	0.578	0.184	0.15	0.087	0.029	0.003
Maltotetraose	Flavonoids	Flavonols	-0.139	0.809	0.749	0.703	0.471	0.229	0.145	0.089	0.034	0.018
Glabridin	Carbohydrates		-0.169	0.581	0.613	0.609	0.437	0.192	0.136	0.083	0.026	0.007
Ferulic acid (sodium)	Flavonoids	Isoflavones	-0.168	0.711	0.711	0.683	0.602	0.204	0.179	0.116	0.039	0.022
D-Erythrose 4-phosphate (sodium)	Phenylpropanoids	Simple phenylpropanoids	-0.18	0.847	0.851	0.685	0.458	0.237	0.2	0.13	0.046	0.025
Berbamine	Ketones/aldehydes/acids		-0.19	0.486	0.741	0.288	0.202	0.191	0.142	0.082	0.021	0.009
2-Phenylacetaldehyde	Alkaloids	Isoquinoline alkaloids	-0.159	0.658	0.689	0.649	0.36	0.234	0.197	0.121	0.052	0.029
(-)-(S)-Equol	Ketones/aldehydes/acids		-0.195	0.861	0.8	0.661	0.494	0.237	0.196	0.113	0.038	0.013
Diosmin	Flavonoids	Flavonols	-0.197	0.797	0.74	0.739	0.512	0.209	0.183	0.116	0.053	0.023
L-(+)-Arabinose	Flavonoids	Flavonols	-0.218	0.825	0.755	0.704	0.484	0.199	0.168	0.1	0.032	0.008
Ginkgolide A	Carbohydrates		-0.208	0.721	0.808	0.647	0.392	0.202	0.154	0.091	0.027	-0.002
2-Phenylethanol	Terpenoids	Diterpenes	-0.196	0.852	0.708	0.674	0.5	0.197	0.165	0.099	0.036	0.009
18β-Glycyrrhetinic acid	Antibiotics	Others	-0.201	0.665	0.62	0.628	0.308	0.188	0.151	0.079	0.024	0.001
2,5-Dihydroxyacetophenone	Terpenoids	Triterpenes	-0.191	0.836	0.849	0.709	0.569	0.21	0.172	0.119	0.055	0.05
Ginsenoside Rk1	Phenols		-0.115	0.787	0.757	0.736	0.595	0.245	0.155	0.078	0.021	0.008
Liensinine (Diperchlorate)	Terpenoids	Triterpenes	-0.134	0.85	0.645	0.533	0.265	0.169	0.128	0.08	0.032	0.017
2',4'-Dihydroxyacetophenone	Alkaloids	Piperidine alkaloids	-0.145	0.837	0.772	0.682	0.598	0.175	0.136	0.084	0.024	0.006
Bisdemethoxycurcumin	Phenols		-0.021	0.789	0.796	0.726	0.569	0.197	0.144	0.078	0.061	0.049
Dicoumarol	Phenols		-0.083	0.814	0.816	0.727	0.564	0.191	0.154	0.101	0.039	0.012
Meisoindigo	Phenylpropanoids	Coumarins	-0.108	0.774	0.8	0.716	0.623	0.218	0.198	0.135	0.075	0.089
Coixol	Alkaloids	Indole alkaloids	-0.068	0.827	0.737	0.741	0.61	0.192	0.141	0.07	0.033	0.009
Tylosin	Others		-0.071	0.867	0.783	0.753	0.709	0.196	0.15	0.072	0.025	0.015
(S)-Malic acid	Antibiotics	Macrolides	-0.15	0.717	0.768	0.692	0.655	0.177	0.114	0.076	0.022	0.006
2'-Hydroxy-4'-methylacetophenone	Ketones/aldehydes/acids		-0.377	0.428	0.46	0.431	0.391	0.157	0.116	0.081	0.038	0.013
Royal Jelly acid	Phenols		-0.111	0.765	0.829	0.699	0.686	0.197	0.151	0.078	0.029	0.003
Isoginkgetin	Ketones/aldehydes/acids		-0.067	0.876	0.91	0.793	0.697	0.209	0.174	0.101	0.053	0.041
5-Methylfurfural	Flavonoids	Biflavonoids	-0.084	0.859	0.902	0.778	0.628	0.176	0.14	0.068	0.024	0.008
Dihydrocoumarin	Ketones/aldehydes/acids		-0.118	0.927	0.802	0.843	0.701	0.175	0.147	0.088	0.042	0.013
Neohesperidin	Phenylpropanoids	Coumarins	-0.131	0.892	0.746	0.879	0.675	0.175	0.134	0.069	0.024	0.005
Dioscin	Flavonoids	Dihydroflavones	-0.104	0.848	0.788	0.681	0.682	0.191	0.113	0.034	0.031	0.014
Hydrocinnamic acid	Steroids		-0.08	0.961	0.777	0.845	0.684	0.202	0.136	0.076	0.029	0.005
Ginsenoside Rg2	Ketones/aldehydes/acids		-0.05	0.753	0.772	0.8	0.727	0.171	0.144	0.088	0.042	0.014
Astragaloside I	Terpenoids	Triterpenes	-0.281	0.825	0.765	0.647	0.552	0.185	0.144	0.088	0.027	0.005
α-L-Rhamnose monohydrate	Terpenoids	Triterpenes	-0.317	1.032	0.935	0.886	0.735	0.188	0.149	0.099	0.041	0.007
Ethyl phenylacetate	Carbohydrates		-0.316	1.041	0.87	0.888	0.71	0.167	0.134	0.087	0.034	0.001
trans-Benzylideneacetone	Others		-0.31	0.9	0.915	0.832	0.664	0.177	0.14	0.088	0.041	0.009
Calycosin-7-O-β-D-glucoside	Ketones/aldehydes/acids		-0.307	1.088	0.875	0.875	0.672	0.179	0.142	0.087	0.029	0.003
Curcumol	Flavonoids	Isoflavones	-0.287	0.821	0.741	0.727	0.657	0.182	0.151	0.096	0.042	0.012
Sinensetin	Terpenoids	Sesquiterpenes	-0.161	0.747	0.818	0.698	0.581	0.221	0.191	0.121	0.049	0.027
(E)-Ethyl p-methoxycinnamate	Flavonoids	Flavonols	-0.152	0.717	0.646	0.675	0.321	0.208	0.173	0.107	0.045	0.014
Isosteviol	Phenylpropanoids	Simple phenylpropanoids	-0.149	0.647	0.66	0.724	0.54	0.19	0.153	0.096	0.034	0.002
Ginsenoside Rc	Terpenoid	Diterpene	-0.127	0.856	0.883	0.657	0.45	0.239	0.192	0.093	0.036	0.013
Shogaol	Terpenoid	Triterpene	-0.251	0.48	0.469	0.438	0.29	0.167	0.135	0.086	0.04	0.008
D-Glucose	Phenols		-0.138	0.765	0.708	0.731	0.521	0.199	0.175	0.104	0.034	0.014
Myricetin	Carbohydrate		-0.256	0.656	0.567	0.543	0.51	0.347	0.332	0.203	0.069	0.044
6''-O-Acetylglycitin	Flavonoids	Flavonols	-0.155	0.5	0.524	0.41	0.365	0.431	0.394	0.35	0.278	0.077
Isoastragaloside I	Flavonoids	Isoflavone	-0.261	0.5	0.503	0.458	0.428	0.446	0.402	0.355	0.307	0.094
(20S)-Protopanaxadiol	Terpenoids	Triterpenes	-0.08	0.625	0.636	0.482	0.461	0.481	0.445	0.393	0.32	0.11
Apigenin	Terpenoids	Triterpenes	-0.149	0.646	0.664	0.494	0.47	0.424	0.411	0.373	0.314	0.147
3,4,5-Trimethoxybenzoic acid	Flavonoids	Flavonols	-0.157	0.629	0.535	0.63	0.469	0.417	0.387	0.352	0.29	0.109
Piperonylic acid	Ketones/aldehydes/acids		-0.08	0.543	0.472	0.468	0.416	0.404	0.383	0.345	0.28	0.105
Isobavachalcone	Ketones/aldehydes/acids		-0.107	0.497	0.446	0.345	0.272	0.267	0.241	0.21	0.157	0.084
Tubeimoside I	Flavonoid	Chalcone	-0.285	0.553	0.588	0.455	0.398	0.396	0.375	0.345	0.298	0.103
D-(-)-Mandelic acid	Terpenoid	Triterpene	-0.197	0.631	0.599	0.486	0.421	0.405	0.378	0.341	0.285	0.105
Isoliquiritigenin	Ketones/aldehydes/acids		-0.243	0.609	0.629	0.523	0.359	0.407	0.384	0.347	0.303	0.128
Quercetin (dihydrate)	Flavonoid	Chalcone	-0.156	0.726	0.746	0.687	0.506	0.349	0.309	0.291	0.17	0.087
Ginsenoside C-K	Flavonoid	Flavonols	-0.146	0.512	0.471	0.368	0.33	0.413	0.357	0.32	0.32	0.057
Angelic acid	Terpenoid	Triterpene	-0.2	0.633	0.602	0.504	0.437	0.418	0.37	0.331	0.277	0.098
Fumaric acid	Ketones/aldehydes/acids		-0.245	0.615	0.568	0.511	0.432	0.385	0.362	0.322	0.289	0.093
3,4,5-Trimethoxycinnamic acid	Ketones/aldehydes/acids		-0.194	0.613	0.559	0.613	0.464	0.404	0.372	0.329	0.286	0.107
1,3,5-Trimethoxybenzene	Phenylpropanoids	Simple phenylpropanoids	-0.219	0.609	0.614	0.549	0.436	0.384	0.368	0.342	0.303	0.127
Methyl stearate	Others		-0.045	0.665	0.613	0.636	0.423	0.406	0.39	0.368	0.319	0.14
Hesperetin	Others		-0.151	0.646	0.62	0.518	0.507	0.394	0.371	0.337	0.279	0.097
Dihydromyricetin	Flavonoid	Dihydroflavone	-0.154	0.653	0.616	0.653	0.5	0.334	0.272	0.17	0.059	0.014
Madecassoside	Flavonoid	Dihydroflavonols	-0.17	0.666	0.547	0.646	0.399	0.356	0.317	0.284	0.249	0.119
(+)-Borneol	Terpenoid	Triterpene	-0.165	0.657	0.583	0.539	0.528	0.406	0.388	0.387	0.316	0.069
meso-Erythritol	Others		0.013	0.58	0.621	0.644	0.519	0.381	0.363	0.33	0.294	0.103
N-Nornuciferine	Carbohydrate		-0.111	0.651	0.611	0.535	0.459	0.393	0.376	0.331	0.27	0.086
Manninotriose	Alkaloids	Isoquinoline alkaloids	-0.117	0.682	0.714	0.46	0.461	0.407	0.379	0.373	0.278	0.108
Glycitin	Carbohydrate		-0.159	0.653	0.661	0.545	0.493	0.408	0.371	0.325	0.272	0.11
Isorhynchophylline	Flavonoids	Isoflavones	0.137	0.614	0.59	0.606	0.502	0.418	0.384	0.329	0.287	0.111
Paradol	Alkaloids	Indole alkaloids	-0.042	0.627	0.565	0.522	0.42	0.365	0.354	0.329	0.269	0.101
Nuciferine	Phenols		-0.146	0.573	0.569	0.557	0.471	0.402	0.373	0.343	0.286	0.105
Jujuboside A	Alkaloids	Isoquinoline alkaloids	-0.236	0.6	0.62	0.551	0.521	0.438	0.406	0.396	0.354	0.163
Malic acid	Terpenoid	Triterpene	-0.268	0.693	0.535	0.601	0.444	0.453	0.418	0.387	0.339	0.161
Citric acid	Ketones/aldehydes/acids		-0.085	0.587	0.587	0.588	0.486	0.47	0.441	0.397	0.364	0.265
3,5-Dihydroxybenzoic acid	Ketones/aldehydes/acids		-0.237	0.576	0.581	0.445	0.47	0.438	0.42	0.373	0.322	0.147
3,4-Dimethoxycinnamic acid	Phenols		-0.113	0.739	0.664	0.663	0.664	0.428	0.411	0.362	0.323	0.116
Nardosinone	Phenylpropanoids	Simple phenylpropanoids	-0.139	0.697	0.718	0.573	0.631	0.424	0.392	0.353	0.323	0.12
Quercetagitrin	Terpenoids	Sesquiterpenes	-0.238	0.741	0.745	0.721	0.663	0.234	0.19	0.11	0.092	0.067
Naringin Dihydrochalcone	Flavonoid	Flavonols	-0.122	0.716	0.711	0.637	0.574	0.41	0.4	0.349	0.314	0.114
Daidzin	Flavonoid	Dihydrochalcones	-0.188	0.744	0.661	0.668	0.6	0.404	0.398	0.365	0.314	0.118
Leonurine (hydrochloride)	Flavonoid	Isoflavones	-0.202	0.779	0.758	0.614	0.614	0.421	0.387	0.366	0.329	0.099
Kojic acid	Alkaloids	Other alkaloids	0.019	0.756	0.698	0.642	0.621	0.407	0.409	0.37	0.303	0.11
Phlorizin	Ketones/aldehydes/acids		-0.175	0.71	0.682	0.654	0.567	0.401	0.378	0.346	0.294	0.096
Neohesperidin dihydrochalcone	Flavonoid	Dihydrochalcones	-0.181	0.672	0.672	0.571	0.528	0.407	0.381	0.35	0.296	0.086
N-Methylbenzylamine	Flavonoid	Dihydrochalcones	-0.049	0.685	0.67	0.643	0.528	0.4	0.373	0.338	0.285	0.081
Inulin	Alkaloids	Other alkaloids	-0.125	0.734	0.694	0.677	0.674	0.421	0.386	0.351	0.301	0.108
Monensin sodium salt	Carbohydrates		0.075	0.789	0.721	0.706	0.696	0.447	0.417	0.413	0.356	0.139
Daucosterol	Antibiotics	Others	-0.081	0.703	0.707	0.692	0.659	0.413	0.38	0.335	0.287	0.108
Rottlerin	Steroids		0.059	0.741	0.713	0.66	0.628	0.428	0.387	0.341	0.279	0.097
Cichoric Acid	Flavonoid	Chalcones	0	0.759	0.776	0.665	0.664	0.389	0.388	0.357	0.298	0.119
Lupeol	Phenylpropanoids	Other phenylpropanoids	-0.024	0.761	0.682	0.66	0.506	0.397	0.367	0.341	0.266	0.101
Beta-Sitosterol (purity>98%)	Steroids		-0.044	0.722	0.659	0.579	0.415	0.41	0.391	0.368	0.313	0.099
Lecithin	Others		-0.075	0.64	0.525	0.527	0.471	0.432	0.393	0.346	0.298	0.085
Beta-Sitosterol (purity>80%)	Steroids		-0.143	0.691	0.648	0.532	0.553	0.423	0.399	0.348	0.298	0.097
Leonurine	Alkaloids	Other alkaloids	0.014	0.651	0.582	0.576	0.652	0.417	0.399	0.339	0.29	0.103
Kalii Dehydrographolidi Succinas	Terpenoids	Diterpenes	-0.242	0.676	0.679	0.579	0.507	0.41	0.39	0.355	0.301	0.109
Isoimperatorin	Phenylpropanoids	Coumarins	-0.017	0.803	0.786	0.716	0.644	0.447	0.41	0.399	0.332	0.144
Nitidine (chloride)	Alkaloids	Isoquinoline alkaloids	-0.1	0.675	0.686	0.703	0.45	0.202	0.173	0.196	0.126	0.081
note: determination of bacterial minimum inhibitory concentrations: evaluating the effects of novel compounds in combination with imipenem

## Sheet: Table S2
Table S2 Determination of the synergistic concentration of imipenem and 2''-O-galloyhyperin by the Punnett Square
K. pneumoniae 2445	a b	0	1	2	4	8	16	32	64	128	256
	0	0.325	0.331	0.306	0.269	0.24	0.238	0.217	0.095	0.061	0.063
	32	0.444	0.438	0.432	0.419	0.375	0.389	0.285	0.225	0.225	0.228
	16	0.429	0.44	0.448	0.44	0.433	0.43	0.415	0.196	0.195	0.195
	8	0.427	0.476	0.499	0.444	0.433	0.439	0.351	0.185	0.185	0.176
	4	0.418	0.43	0.441	0.428	0.433	0.439	0.435	0.145	0.137	0.156
	2	0.419	0.479	0.475	0.433	0.423	0.433	0.384	0.148	0.127	0.167
A. baumannii 3011	a b	0	1	2	4	8	16	32	64	128	256
	0	0.89	0.89	0.86	0.851	0.876	0.873	0.827	0.448	0.059	0.064
	32	0.813	0.82	0.817	0.75	0.74	0.749	0.748	0.47	0.212	0.235
	16	0.824	0.848	0.86	0.864	0.876	0.826	0.719	0.414	0.182	0.193
	8	0.815	0.816	0.749	0.752	0.792	0.789	0.733	0.291	0.171	0.179
	4	0.779	0.796	0.772	0.761	0.797	0.704	0.713	0.318	0.136	0.138
	2	0.779	0.804	0.805	0.807	0.803	0.8	0.735	0.332	0.15	0.14
K. oxytoca 3428	a b	0	0.25	0.5	1	2	4	8	16	32	64
	0	0.396	0.362	0.327	0.387	0.215	0.184	0.07	0.062	0.06	0.06
	32	0.429	0.427	0.48	0.461	0.329	0.281	0.22	0.222	0.213	0.223
	16	0.461	0.451	0.41	0.37	0.321	0.269	0.234	0.197	0.187	0.194
	8	0.403	0.422	0.4	0.48	0.428	0.294	0.193	0.176	0.169	0.171
	4	0.395	0.4	0.49	0.455	0.306	0.268	0.118	0.122	0.106	0.125
	2	0.42	0.399	0.398	0.392	0.341	0.376	0.161	0.166	0.163	0.185
P. aeruginosa 18083286	a b	0	0.25	0.5	1	2	4	8	16	32	64
	0	0.801	0.859	0.798	0.795	0.848	0.716	0.774	0.776	0.192	0.07
	32	0.871	0.82	0.859	0.82	0.813	0.779	0.752	0.739	0.366	0.428
	16	0.784	0.851	0.842	0.795	0.78	0.796	0.8	0.785	0.647	0.195
	8	0.797	0.808	0.804	0.786	0.795	0.794	0.805	0.767	0.294	0.176
	4	0.772	0.815	0.825	0.85	0.752	0.787	0.824	0.778	0.236	0.144
	2	0.802	0.79	0.777	0.791	0.782	0.796	0.729	0.731	0.235	0.144
P. aeruginosa 18102011	a b	0	8	32	64	128	256	512	1024	2048	4096
	0	0.809	0.561	0.565	0.55	0.551	0.542	0.51	0.421	0.274	0.216
	32	0.792	0.542	0.529	0.51	0.476	0.493	0.489	0.326	0.178	0.134
	16	0.805	0.423	0.423	0.448	0.408	0.402	0.416	0.214	0.119	0.098
	8	0.742	0.341	0.346	0.357	0.32	0.363	0.325	0.166	0.095	0.096
	4	0.648	0.412	0.384	0.36	0.342	0.391	0.352	0.185	0.092	0.086
	2	0.734	0.441	0.376	0.378	0.344	0.357	0.356	0.204	0.111	0.098
E. coli D2011	a b	0	8	32	64	128	256	512	1024	2048	4096
	0	0.487	0.474	0.476	0.471	0.453	0.457	0.455	0.411	0.199	0.074
	32	0.531	0.516	0.503	0.505	0.508	0.536	0.468	0.094	0.078	0.079
	16	0.494	0.474	0.465	0.459	0.456	0.482	0.477	0.092	0.064	0.074
	8	0.474	0.466	0.467	0.462	0.456	0.477	0.487	0.127	0.077	0.076
	4	0.474	0.448	0.45	0.446	0.445	0.454	0.475	0.164	0.065	0.077
	2	0.495	0.453	0.459	0.448	0.441	0.469	0.477	0.239	0.078	0.086
note: a. 2’’-O-galloylhyperin concentration (µg/mL); b. Imipenem concentration (µg/mL)

## Sheet: Table S3
	Table S3 Transcriptome sequencing quality
	name	Raw. reads	Clean. reads	Raw. bases (Gb)	Clean. bases (Gb)	Error. rate	Q20 (%)	Q30 (%)	GC (%)
	Y1-2011	7, 902, 118	7, 625, 316	1.2	1.1	0.03	97.57	93.33	63.42
	Y2-2011	7, 786, 074	7, 646, 860	1.2	1.1	0.03	97.66	93.58	64.85
	Y3-2011	7, 580, 494	7, 333, 082	1.1	1.1	0.03	97.56	93.24	64.98
	D1-2011	8, 607, 032	8, 438, 024	1.3	1.3	0.03	97.15	92.4	63.59
	D2-2011	7, 883, 092	7, 704, 602	1.2	1.2	0.03	97.29	97.73	63.75
	D3-2011	7, 707, 082	7, 539, 908	1.2	1.1	0.03	97.37	92.89	63.62
	O2-1-2011	7, 682, 414	7, 579, 840	1.2	1.1	0.03	97.43	93.13	66.68
	O2-2-2011	7, 538, 516	7, 383, 030	1.1	1.1	0.03	97.61	93.37	64.57
	O2-3-2011	8, 300, 426	8, 040, 046	1.2	1.2	0.03	97.69	93.5	62.88
	IMP-1-2011	7, 700, 210	7, 544, 212	1.2	1.1	0.03	97.64	93.44	63.26
	IMP-2-2011	8, 352, 592	8, 206, 202	1.3	1.2	0.03	97.38	93.03	63.14
	IMP-3-2011	8, 008, 564	7, 857, 250	1.2	1.2	0.03	97.46	93.09	62.97
	IMPO-1-2011	7, 994, 008	7, 866, 866	1.2	1.2	0.03	97.88	93.9	63.2
	IMPO-2-2011	7, 913, 816	7, 645, 412	1.2	1.1	0.03	97.56	93.53	62.28
	IMPO-3-2011	8, 005, 196	7, 787, 258	1.2	1.2	0.03	97.76	93.7	63.3

## Sheet: Table S4
Table S4 Information of cluster 4 genes
number	location	gene description
1	pP2011-1 (485,988-486,899)	Plasmid replicon gene repA
2	Chromosome (657,637-657,864)	hypothetical protein
3	Chromosome (739,048-739,356)	4TM region of pyridine nucleotide transhydrogenase
4	Chromosome (815,214-815,729)	Protein of unknown function DUF962
5	Chromosome (818,257-819,246)	TOBE-like domain
6	Chromosome (819,250-820,119)	Inner membrane component of the binding protein-dependent transport system
7	Chromosome (820,130-820,948)	Inner membrane component of the binding protein-dependent transport system
8	Chromosome (821,110-822,108)	Bacterial extracellular solute-binding protein
9	Chromosome (822,285-822,467)	hypothetical protein
10	Chromosome (1,074,516-1,075,997)	Cytochrome d1 heme domain
11	Chromosome (1,075,988-1,076,827)	Tetrapyrrole (corrin/porphyrin) methyltransferase
12	Chromosome (1,076,838-1,078,001)	4Fe-4S single cluster domain
13	Chromosome (1,077,995-1,078,510)	hypothetical protein
14	Chromosome (1,078,485-1,078,928)	hypothetical protein
15	Chromosome (1,078,921-1,079,445)	hypothetical protein
16	Chromosome (1,079,442-1,079,894)	AsnC-type helix-turn-helix (HTH) domain
17	Chromosome (1,079,903-1,081,081)	Cytochrome D1 heme domain
18	Chromosome (1,081,078-1,081,437)	Cytochrome c oxidase, cbb3-type, subunit III
19	Chromosome (1,081,434-1,081,748)	Cytochrome c oxidase, cbb3-type, subunit III
20	Chromosome (1,081,799-1,083,505)	Cytochrome c oxidase, cbb3-type, subunit III
21	Chromosome (1,084,538-1,085,065)	Cytochrome c oxidase subunit III
22	Chromosome (1,085,420-1,085,860)	Cytochrome c
23	Chromosome (1,085,860-1,087,257)	Cytochrome c and quinol oxidase polypeptide I
24	Chromosome (1,087,259-1,089,097)	hypothetical protein
25	Chromosome (1,089,104-1,089,298)	hypothetical protein
26	Chromosome (1,585,724-1,586,737)	NMT1/THI5 domain-like protein
27	Chromosome (1,586,802-1,587,593)	ABC transporter
28	Chromosome (1,593,799-1,594,773)	Sigma-54 interaction domain
29	Chromosome (1,594,948-1,595,727)	NLPA lipoprotein
30	Chromosome (2,057,752-2,058,228)	Ferritin-like domain
31	Chromosome (2,071,087-2,071,281)	hypothetical protein
32	Chromosome (2,144,840-2,145,478)	AhpC/TSA family
33	Chromosome (2,148,462-2,149,055)	NADPH-dependent FMN reductase
34	Chromosome (2,149,174-2,150,145)	NMT1/THI5 domain-like protein
35	Chromosome (2,150,223-2,151,371)	Luciferase-like monooxygenase
36	Chromosome (2,151,392-2,152,180)	Periplasmic binding protein-dependent transport system inner membrane component
37	Chromosome (2,152,177-2,153,001)	ABC transporter
38	Chromosome (2,158,552-2,158,941)	LrgA family
39	Chromosome (2,158,928-2,159,614)	LrgB family
40	Chromosome (2,196,800-2,197,336)	NosL protien
41	Chromosome (2,197,353-2,198,180)	ABC-2 family transporter
42	Chromosome (2,198,171-2,199,085)	ABC transporter
43	Chromosome (2,199,082-2,200,368)	Periplasmic copper-binding protein (NosD)
44	Chromosome (2,200,365-2,202,275)	hypothetical protein
45	Chromosome (2,202,318-2,204,465)	4Fe-4S single cluster domain
46	Chromosome (2,263,440-2,263,679)	hypothetical protein
47	Chromosome (2,876,625-2,876,701)	hypothetical protein
48	Chromosome (2,995,642-2,996,823)	FAD-binding domain of oxidoreductase
49	Chromosome (2,996,878-2,997,135)	hypothetical protein
50	Chromosome (2,997,122-2,998,315)	NnrS protein
51	Chromosome (3,429,741-3,430,301)	Decarboxylase family
52	Chromosome (3,450,116-3,450,697)	Cupin superfamily domain
53	Chromosome (3,450,752-3,450,910)	hypothetical protein
54	Chromosome (3,470,449-3,471,198)	Bacterial regulatory protein GntR family
55	Chromosome (3,471,195-3,472,919)	FAD-binding domain
56	Chromosome (3,473,005-3,473,250)	hypothetical protein
57	Chromosome (3,576,235-3,577,893)	Sodium:solute symporter family
58	Chromosome (3,577,890-3,578,213)	DUF485 (Domain of Unknown Function 485)
59	Chromosome (3,578,270-3,579,919)	AMP ligase
60	Chromosome (3,580,003-3,580,770)	Enoyl-[acyl-carrier-protein] reductase (ENR)
61	Chromosome (3,580,770-3,581,942)	Acyl-CoA dehydrogenase, N-terminal domain
62	Chromosome (3,581,993-3,582,349)	hypothetical protein
63	Chromosome (3,582,346-3,583,401)	Phosphotransferase Family
64	Chromosome (3,615,893-3,616,206)	hypothetical protein
65	Chromosome (3,675,672-3,676,208)	hypothetical protein
66	Chromosome (3,781,273-3,781,779)	Sigma-70 Factor Domain 2
67	Chromosome (3,859,569-3,859,709)	hypothetical protein
68	Chromosome (4,007,559-4,009,001)	Cytochrome c and Ubiquinol Oxidase Polypeptide I
69	Chromosome (4,009,004-4,009,225)	hypothetical protein
70	Chromosome (4,028,976-4,029,473)	DUF934 (Domain of Unknown Function 485)
71	Chromosome (4,330,007-4,330,192)	hypothetical protein
72	Chromosome (4,483,144-4,484,526)	FAD-Linked Domain
73	Chromosome (4,760,724-4,761,053)	NapD protein
74	Chromosome (4,967,631-4,968,344)	Pilus assembly chaperone protein PapD
75	Chromosome (5,030,819-5,031,367)	Cytochrome b561
76	Chromosome (5,280,539-5,281,015)	hypothetical protein
77	Chromosome (5,428,865-5,429,620)	Acetyltransferase domain
78	Chromosome (5,638,982-5,639,057)	hypothetical protein
79	Chromosome (5,682,973-5,683,046)	hypothetical protein
80	Chromosome (5,683,318-5,684,463)	SPFH domain/Band 7 Family
81	Chromosome (5,684,519-5,685,733)	tRNA restriction endonuclease RtcB
82	Chromosome (5,685,770-5,686,582)	Nucleotidyltransferase
83	Chromosome (5,686,579-5,687,604)	The insertion domain of RNA 3’-terminal phosphate cyclase (RTC)
84	Chromosome (5,688,207-5,689,247)	Cytochrome c
85	Chromosome (5,720,647-5,721,081)	Copper resistance protein D

## Sheet: Table S5
Table S5 Genes associated with propionate metabolism and TCA cycle KEGG pathways, identified by Cytoscape analysis
name	Description	expression level	KEGG pathway	Degree
gltA	PF00285:Citrate synthase, C-terminal domain	up	TCA cycle	35
acsA1	PF00501:AMP-binding enzyme|PF13193:AMP-binding enzyme C-terminal domain|PF16177:Acetyl-coenzyme A synthetase N-terminus	up	propanoate metabolic pathway	30
pta	PF13500:AAA domain|PF07085:DRTGG domain|PF01515:Phosphate acetyl/butaryl transferase	down	propanoate metabolic pathway	30
cfiB	PF02786:Carbamoyl-phosphate synthase L chain, ATP binding domain|PF02785:Biotin carboxylase C-terminal domain|PF00289:Biotin carboxylase, N-terminal domain	down	TCA cycle	28
pycB	PF00682:HMGL-like|PF00364:Biotin-requiring enzyme|PF02436:Conserved carboxylase domain	down	TCA cycle	28
sucA	PF02779:Transketolase, pyrimidine binding domain|PF16078:2-oxoglutarate dehydrogenase N-terminus|PF16870:2-oxoglutarate dehydrogenase C-terminal|PF00676:Dehydrogenase E1 component	up	TCA cycle	26
pdhA	PF00676:Dehydrogenase E1 component	down	propanoate metabolic pathway	25
pdhB	PF00676:Dehydrogenase E1 component	down	propanoate metabolic pathway	23
aceF	PF02817:e3 binding domain|PF00364:Biotin-requiring enzyme|PF00198:2-oxoacid dehydrogenases acyltransferase (catalytic domain)	up	TCA cycle	22
pdhC	PF00364:Biotin-requiring enzyme|PF02817:e3 binding domain|PF00198:2-oxoacid dehydrogenases acyltransferase (catalytic domain)	down	propanoate metabolic pathway	22
aceE	PF00456:Transketolase, thiamine diphosphate binding domain	up	TCA cycle	22
sucD	PF00549:CoA-ligase|PF02629:CoA binding domain	up	propanoate metabolic pathway;TCA cycle	22
cat1	PF13336:Acetyl-CoA hydrolase/transferase C-terminal domain|PF02550:Acetyl-CoA hydrolase/transferase N-terminal domain	up	TCA cycle	20
fumC1	PF00206:Lyase|PF10415:Fumarase C C-terminus	up	propanoate metabolic pathway;TCA cycle	20
sucB	PF00198:2-oxoacid dehydrogenases acyltransferase (catalytic domain)|PF00364:Biotin-requiring enzyme|PF02817:e3 binding domain	up	TCA cycle	19
accA	PF03255:Acetyl co-enzyme A carboxylase carboxyltransferase alpha subunit			18
lpdG	PF07992:Pyridine nucleotide-disulphide oxidoreductase|PF02852:Pyridine nucleotide-disulphide oxidoreductase, dimerisation domain	up	propanoate metabolic pathway;TCA cycle	18
accC	Biotin carboxylase C-terminal domain|PF00289:Biotin carboxylase, N-terminal domain|PF02786:Carbamoyl-phosphate synthase L chain, ATP binding domain	up	propanoate metabolic pathway	17
bkdB	PF00198:2-oxoacid dehydrogenases acyltransferase (catalytic domain)|PF00364:Biotin-requiring enzyme|PF02817:e3 binding domain	down	propanoate metabolic pathway	17
accB	PF00364:Biotin-requiring enzyme	up	propanoate metabolic pathway	16
prpB	PF13714:Phosphoenolpyruvate phosphomutase	up	propanoate metabolic pathway	16
accC	Biotin carboxylase, N-terminal domain|PF02786:Carbamoyl-phosphate synthase L chain, ATP binding domain|PF02785:Biotin carboxylase C-terminal domain	up	propanoate metabolic pathway	16
lpdV	PF07992:Pyridine nucleotide-disulphide oxidoreductase|PF02852:Pyridine nucleotide-disulphide oxidoreductase, dimerisation domain	down	propanoate metabolic pathway;TCA cycle	16
sucC	PF08442:ATP-grasp domain|PF00549:CoA-ligase	up	propanoate metabolic pathway;TCA cycle	16
Ecil	PF00378:Enoyl-CoA hydratase/isomerase	down	propanoate metabolic pathway	15
mqo1	PF06039:Malate:quinone oxidoreductase (Mqo)	up	TCA cycle	13
mqo2	PF06039:Malate:quinone oxidoreductase (Mqo)	up	TCA cycle	13
sdhD	PF01127:Succinate dehydrogenase/Fumarate reductase transmembrane subunit	up	TCA cycle	13
bkdA1	PF12573:2-oxoisovalerate dehydrogenase E1 alpha subunit N terminal|PF00676:Dehydrogenase E1 component	down	propanoate metabolic pathway	10
mmsA	PF00171:Aldehyde dehydrogenase family	down	propanoate metabolic pathway	9
bauC	PF00171:Aldehyde dehydrogenase family	up	propanoate metabolic pathway	9
AF_1211	PF13380:CoA binding domain|PF13607:Succinyl-CoA ligase like flavodoxin domain|PF13549:ATP-grasp domain	down	propanoate metabolic pathway	9
MJ0033	PF02910:Fumarate reductase flavoprotein C-term|PF00890:FAD binding domain	down	TCA cycle	9
bauA	PF00202:Aminotransferase class-III	up	propanoate metabolic pathway	8
icd	PF03971:Monomeric isocitrate dehydrogenase	up	TCA cycle	8
bauA	PF00202:Aminotransferase class-III	up	propanoate metabolic pathway	7
acnA	PF00694:Aconitase C-terminal domain|PF00330:Aconitase family (aconitate hydratase)	down	TCA cycle	6
ackA	PF00871:Acetokinase family	down	propanoate metabolic pathway	5
prpF	PF04303:PrpF protein	up	propanoate metabolic pathway	3
prpD	PF03972:MmgE/PrpD family	up	propanoate metabolic pathway	3
